1 **Title:** Augmenting Quadriplegic Hand Function Using a Sensorimotor Demultiplexing Neural  
2 Interface

3 **Authors:** Ganzer PD<sup>1\*</sup>, Ph.D.; Colachis SC<sup>1</sup>, M.S.; Schwemmer MA<sup>4</sup>, Ph.D.; Friedenber DA<sup>4</sup>,  
4 Ph.D.; Swiftney CE<sup>1</sup>, M.S.; Jacobowitz AF<sup>1</sup>, B.S.; Weber DJ<sup>1,5</sup>, Ph.D.; Bockbrader MA<sup>2,3</sup>, M.D.,  
5 Ph.D.; Sharma G<sup>1</sup>, Ph.D.

6 **Affiliations:**

7 1 Medical Devices and Neuromodulation, Battelle Memorial Institute, 505 King Ave, Columbus, OH, USA  
8 43201

9 2 Center for Neuromodulation, The Ohio State University, Columbus, Ohio, 43210, USA.

10 3 Department of Physical Medicine and Rehabilitation, The Ohio State University, Columbus, Ohio, 43210, USA.

11 4 Advanced Analytics and Health Research, Battelle Memorial Institute, 505 King Ave, Columbus, OH, USA  
12 43201

13 5 Department of Bioengineering, University of Pittsburgh, 4200 Fifth Ave, Pittsburgh, PA USA 15260

14

15 \* Author for correspondence: [ganzer@battelle.org](mailto:ganzer@battelle.org), Tel: 614-424-5143

16

17

18

19

20

21

22

23

24

25

26

27

28

29

30

31

32

33

34

35

36

37 **Abstract:**

38 Background:

39 The sense of touch is a key component of motor function. Severe spinal cord injury (SCI) should  
40 essentially eliminate sensory information transmission to the brain, that originates from skin  
41 innervated from below the lesion. We assessed the hypothesis that, following SCI, residual hand  
42 sensory information is transmitted to the brain, can be decoded amongst competing sensorimotor  
43 signals, and used to enhance the sense of touch via an intracortically controlled closed-loop brain-  
44 computer interface (BCI) system.

45 Methods:

46 Experiments were performed with a participant who has an AIS-A C5 SCI and an intracortical  
47 recording array implanted in left primary motor cortex (M1). Sensory stimulation and standard  
48 clinical sensorimotor functional assessments were used throughout a series of several mechanistic  
49 experiments.

50

51 Findings:

52 Our results demonstrate that residual afferent hand sensory signals surprisingly reach human  
53 primary motor cortex and can be simultaneously demultiplexed from ongoing efferent motor  
54 intention, enabling closed-loop sensory feedback during brain-computer interface (BCI) operation.  
55 The closed-loop sensory feedback system was able to detect residual sensory signals from up to  
56 the C8 spinal level. Using the closed-loop sensory feedback system enabled significantly enhanced  
57 object touch detection, sense of agency, movement speed, and other sensorimotor functions.

58

59 Interpretation:

60 To our knowledge, this is the first demonstration of simultaneously decoding multiplexed afferent  
61 and efferent activity from human cortex to control multiple assistive devices, constituting a  
62 ‘sensorimotor demultiplexing’ BCI. Overall, our results support the hypothesis that sub-perceptual  
63 neural signals can be decoded reliably and transformed to conscious perception, significantly  
64 augmenting function.

65

66 Funding: Internal funding was provided for this study from Battelle Memorial Institute and The  
67 Ohio State University Center for Neuromodulation.

68 **Introduction:**

69 Spinal cord injury (SCI) damages sensorimotor circuits leading to paralysis, an impaired sense of  
70 agency, and sensory dysfunction. Several studies have employed a brain-computer interface (BCI)  
71 to restore motor control via a robotic limb or other assistive device<sup>1-3</sup>. Recent work demonstrates  
72 that a once paralyzed limb can be reanimated using motor intention decoded from primary motor  
73 cortex (M1)<sup>4-8</sup>, addressing the need of patients with SCI to regain use of their own hand<sup>9</sup>. This  
74 decoded M1 signal activates functional electrical stimulation (FES) of the arm musculature to  
75 produce the intended hand movement. Unfortunately, ascending sensory information is also  
76 disrupted by SCI from key regions of the hand during movement. This further impacts function,  
77 as the sense of touch is critical for multiple aspects of motor control<sup>10</sup>. The vast majority of BCI  
78 systems do not address these debilitating sensory deficits, ultimately limiting their utility as an  
79 interface that addresses both the affected motor and sensory circuits impacted by SCI.

80

81 Sensory function can potentially be augmented using a BCI that can decipher residual sensory  
82 neural activity from the impaired hand and dynamically translate this into closed-loop sensory  
83 feedback that the user can perceive. Intriguingly, recent study demonstrates that residual sub-  
84 perceptual sensory information from below the lesion is transmitted to sensory areas of the brain,  
85 even following severe clinically complete SCI<sup>11</sup>. M1 may encode sensory and touch-related signals  
86 following severe clinically complete SCI, although it has not yet been reported. Essentially all BCI  
87 studies that target M1 do so to decode motor intention<sup>1-8</sup>. Sensory information may also be  
88 available in M1 that can be used for BCI control.

89

90 Although promising, decoding sensory information for closed-loop BCI purposes is challenging  
91 for several reasons. First, there is a need to assess how sensory information transmitted from the  
92 impaired hand may be represented in the brain, if at all, following severe SCI. Furthermore,  
93 sensory and motor neural signals may be multiplexed<sup>12</sup> together at the BCI recording site,  
94 significantly complicating the simultaneous and reliable decoding of multiple device control  
95 signals.

96

97 **Methods:**

98 Experimental Design: The participant was a 27-year-old male with an AIS-A C5 SCI (with a zone  
99 of partial preservation at C6; see Methods, *Study Participant*) and has participated in our previous  
100 studies<sup>4-7</sup>. We performed a series of experiments using either passive sensory stimulation (Fig. 1,  
101 Supplemental Fig. S1-S4) or active object touch (Fig. 2, 3, Supplemental Fig. S5 & S6) to assess  
102 cortical neurophysiology, neural signal decoding, and assistive device control for upper limb  
103 functional improvement. Approval for this study was obtained from the U.S. Food and Drug  
104 Administration (Investigational Device Exemption) and the Ohio State University Medical Center  
105 Institutional Review Board (Columbus, Ohio). The study met institutional requirements for the  
106 conduct of human subjects and was registered on the ClinicalTrials.gov website (Identifier  
107 NCT01997125; Date: November 22, 2013). All experiments were performed in accordance with  
108 the relevant guidelines and regulations set by the Ohio State University Medical Center. The  
109 participant referenced in this work provided permission for photographs and videos and completed  
110 an informed consent process prior to commencement of the study. Please see the Supplemental  
111 Appendix for additional methods details.

112

### 113 Results:

114 In this study, we sought to perform sensorimotor signal demultiplexing from M1, to enable a BCI  
115 system capable of simultaneously controlling multiple devices for enhancing both motor and  
116 sensory hand function. All experiments were performed in a chronically paralyzed participant with  
117 an AIS-A C5 SCI. We first assessed the participant's residual hand sensory function (in the absence  
118 of visual feedback<sup>26</sup>). He was unable to perceive sensory stimuli to skin innervated below spinal  
119 level C6 (clinical tactile assay: Fig. 1A). This sensory impairment was also present during FES-  
120 mediated object grip. For example, the participant operated below chance when asked to report if  
121 he was gripping an object in the absence of visual feedback (Fig. 1B), a significant sensory  
122 impairment further contributing to motor dysfunction.

123

124 We next investigated whether residual sensory information could significantly modulate neural  
125 activity following skin stimulation (Fig. 1C, Supplemental Fig. S1A-C). Sensory stimuli robustly  
126 modulated contralateral M1 (Fig. 1D-G; Supplemental Fig. S2). Stimulation of skin innervated  
127 from above or at the C5 SCI evoked time-locked neural modulation, lasting ~10 times longer than  
128 the stimulus duration (Fig. 1E). Stimuli applied to skin innervated from below the SCI (index and

129 middle) evoked modest neural modulation in M1, with stimulation to the forearm and thumb  
130 evoking significantly larger responses (Fig. 1F:  $F[3,380] = 9.8$ ,  $p < 0.001$ , Fig. 1G). As expected,  
131 separate control experiments demonstrated little to no M1 activation following sensory stimuli to  
132 the left arm, ipsilateral to the recording array (Supplemental Fig. S3). These results support the  
133 hypothesis that sensory stimuli to skin innervated from both above and below the SCI significantly  
134 modulates M1.

135  
136 Next, we explored whether this sensory activity can be decoded from M1. Decodable sensory  
137 events could control a feedback device for improving the impaired sense of touch. We trained a  
138 support vector machine (SVM) to detect the skin region being passively stimulated (i.e., a ‘passive  
139 sensory decoder’), given the underlying neural activity. Sensory stimulus location was reliably  
140 decoded from M1 across a period of several months, performing significantly above chance with  
141 low false positive rates (Fig. 1H; Supplemental Fig. S2C). Interestingly, passive sensory decoders  
142 for locations that the participant can feel (forearm and thumb) performed equivalently to passive  
143 sensory decoders for locations that the participant largely cannot feel (index and middle)  
144 (Supplemental Fig. S4). This result demonstrates the ability to decode residual sensory neural  
145 activity from M1 that is below conscious perception, from functionally relevant hand dermatomes.

146  
147 Residual sensory activity could also be decoded in a more challenging context during active object  
148 touch using a separate SVM (i.e., a ‘touch decoder’, Fig. 2; see Methods). During validation  
149 experiments, touch decoder activation was synchronized to force application from the hand  
150 (Supplemental Fig. S5) and performed with high responsiveness during object touch events (~84  
151 %; Fig. 2A, ‘Touch’;  $F[4,85] = 777$ ,  $p < 0.001$ ; Supplemental Video 1, panel A). As expected, the  
152 touch decoder was not activated during control cues which did not have touch events (Fig. 2A,  
153 ‘No Touch’; Supplemental Video 1, panels B & C; ‘Rest’ occurs when the cued period is off).  
154 These results reveal that residual sensory neural activity can be decoded reliably from M1 during  
155 active object manipulation.

156  
157 The participant was next interfaced with a vibrotactile array on the right bicep, to enable closed-  
158 loop sensory feedback (Fig. 2B). This interface was controlled in real time by a touch decoder, to  
159 enhance the perception of hand sensory events that are significantly impaired following SCI. The

160 closed-loop sensory feedback system was able to detect residual sensory signals from up to the C8  
161 spinal level, therefore including the insensate regions of the hand (using clinical tactile assay of  
162 hand dermatomes; see Methods). Without using the closed-loop feedback system, the participant  
163 operated below chance when asked to report if he was gripping an object (Fig. 2C, white; in the  
164 absence of visual feedback<sup>26</sup>), largely due to being completely insensate on the vast majority of  
165 his hand (clinical tactile assay: Fig. 1A). Closed-loop sensory feedback enabled improved object  
166 touch detection from below chance to an over 90% detection rate (Fig. 2C, gray;  $t(30) = 3.5$ ,  $p =$   
167  $0.001$ ; Fig. 2D) compared to control (Fig. 2C, white). These significant sensory improvements  
168 were enabled by sub-perceptual sensory neural activity that is demultiplexed from M1 and  
169 enhanced into conscious perception.

170  
171 Our final set of experiments assessed the hypothesis that afferent and efferent activity in M1 can  
172 be demultiplexed to simultaneously control devices for sensory feedback and FES, constituting a  
173 ‘sensorimotor demultiplexing’ BCI. The ‘sensorimotor demultiplexing’ BCI system is shown in  
174 Fig. 3A. The touch decoder is used to control closed-loop vibrotactile sensory feedback (red band  
175 on bicep) and enhance hand touch events. The motor decoder is used to simultaneously control  
176 FES of the arm (blue bands on forearm) and produce the desired hand movement. Real-time  
177 ‘sensorimotor demultiplexing’ was first demonstrated during a modified grasp and release test  
178 (GRT)<sup>13</sup>. The participant cannot perform this task without using the system (data not shown),  
179 similar to our previous studies<sup>6,7</sup>. The participant was first cued to position his hand around the  
180 object (Fig. 3B, cue at 0 s), and then generate motor intention to activate FES and transfer the  
181 object. The touch decoder always preceded the motor decoder, and was time locked to object touch  
182 (Fig. 3B; Supplemental Video 2).

183  
184 We finally enabled ‘sensorimotor demultiplexing’ BCI control using the simultaneous decoding  
185 of touch events and motor intention during a set of upper limb assessments. This closed-loop  
186 demultiplexing BCI system enabled significant improvements in sense of agency (Fig. 3C;  $t(46) =$   
187  $3$ ,  $p = 0.004$ ), motor decoder latency (Fig. 3D, left;  $t(148) = 2.9$ ,  $p = 0.003$ ), and object transfer  
188 time (Fig. 3D, right;  $t(148) = 2.1$ ,  $p = 0.03$ ) (Supplemental Fig. S6: exemplary decoder inputs and  
189 outputs), compared to a motor-only BCI control. Therefore, rapid closed-loop sensory feedback  
190 not only augments sensory function, but also augments motor function. Furthermore, these results

191 provide substantial evidence that sensory feedback during movement can enhance the sense of  
192 agency and other benefits of enhanced sensorimotor integration in patients with upper limb  
193 dysfunction<sup>14-16</sup>. Overall, successful ‘sensorimotor demultiplexing’ occurred on 100% of task trials  
194 (198 total trials). To our knowledge, these findings represent the first demonstration of a BCI  
195 system that simultaneously demultiplexes afferent and efferent activity from human cortex for  
196 controlling multiple assistive devices and enhancing function.

197

## 198 **Discussion:**

199 Severe AIS-A SCI should essentially eliminate sensory information transmission to the brain, that  
200 originates from skin innervated from below the lesion. Our results demonstrate that hand sensory  
201 signals surprisingly reach M1, even after AIS-A SCI. The participant’s severe C5 SCI functionally  
202 blocks communication with the hand, but a clinically complete SCI does not necessarily equate to  
203 an anatomically complete SCI. Recent study demonstrates that residual sub-perceptual sensory  
204 information from below the lesion is transmitted to sensory areas of the brain, even following  
205 severe clinically complete SCI<sup>11</sup>. Our findings support the hypothesis that there is some anatomical  
206 sparing of spinal tissue even after severe AIS-A SCI, allowing sensory information transmission  
207 from below the lesion to M1, at sufficient levels for enabling new sensory related BCI capabilities.  
208 There are likely additional signal types encoded in M1, beyond motor intention and touch related  
209 sensory information. In the future, we hope this new set of findings will enable patients with an  
210 implanted BCI to maximize the information encoded in the recorded neural activity for new  
211 functional gains.

212

213 The function restored to the participant using the sensorimotor demultiplexing BCI was significant  
214 in several sensorimotor functional domains, ranging from the cognitive control of hand function<sup>18</sup>  
215 to sensorimotor integration. Our control condition throughout all functional assessments was the  
216 participant operating the BCI system using only motor control. This control condition is essentially  
217 the most challenging control condition possible under the current experimental design. We  
218 therefore have designed all experiments to maximally challenge any measured functional  
219 improvements during sensorimotor demultiplexing BCI control. Nonetheless, the effect sizes are  
220 robust for the functional gains during sensorimotor demultiplexing BCI control. These gains range  
221 from an over a 100% improvement to a significant ~0.5 second increase in BCI system speed and

222 subsequent upper limb sensorimotor capability. We hypothesize that even larger improvements  
223 can be achieved when assessing additional functions in the absence of visual feedback. Closed-  
224 loop tactile feedback may mitigate the reliance of BCI users on visually attending to the state of  
225 the hand during movement. This would free the user's visual stream for other important functions  
226 during upper limb activity. For example, closed-loop tactile feedback should enable increased BCI  
227 operation safety during multitasking, via notifying the user that an object has slipped from their  
228 grasp or enabling visual attention to other stimuli, other than the hand, during activities of daily  
229 living.

230  
231 These set of experiments demonstrate the ability to simultaneously reanimate both motor and  
232 sensory function in a paralyzed and largely insensate limb. There are alternative ways to provide  
233 sensory feedback, including intracortical microstimulation (ICMS) in S1<sup>16,17</sup>. Compared to ICMS  
234 in S1, tactile-based feedback enables rapid sensory perception at a significantly faster latency<sup>17</sup>.  
235 This was a significant contributor to the choice of using vibrotactile feedback in the current study.  
236 We also chose to use the participant's natural remaining sensory circuitry for object touch  
237 decoding and address the need of patients with SCI to use their own hand during upper limb  
238 activity<sup>9</sup>.

239  
240 BCIs are emerging as a new means to treat patients suffering from an array of functional deficits<sup>1-</sup>  
241 <sup>8</sup>. Accurately and consistently decoding a single device control signal is a significant challenge for  
242 BCIs. Here we extend capabilities of BCI technology to simultaneously decipher multiplexed<sup>12</sup>  
243 afferent and efferent neural activity and dynamically control motor and sensory augmentation  
244 devices. Our results support the hypothesis that sub-perceptual residual neural information can be  
245 reliably decoded from the human brain, and transformed to conscious perception to augment  
246 function.

247  
248 BCI electrode arrays for treating upper limb dysfunction are almost exclusively implanted in neural  
249 tissue to decode motor intention signals alone<sup>1-8</sup>. The sensorimotor demultiplexing capability  
250 should impact how BCI electrode array implant locations are determined, for interfaces seeking to  
251 decode multiplexed information classes relevant for BCI control. It will be critical to perform  
252 multimodal pre-surgical brain mapping to localize these relevant neural representations and further



253 inform electrode array implant location. For example, seemingly small areas of the nervous system  
254 may simultaneously encode multiplexed<sup>12</sup> classes of sensory, motor, and contextual information  
255 relevant for next-generation neural interfaces and context adapting sensorimotor therapeutics. We  
256 anticipate future efforts that maximize information extraction from neural data, and significantly  
257 increase the capability neural interfaces. Furthermore, the data presented here is from a neural  
258 interface that has been implanted for over 5 years (at the time of this writing). Reliable next-  
259 generation neural interfaces will also need to function for many years to mediate long-term benefits  
260 in patients<sup>27,28</sup>.

261  
262 Human cortex is generally modular and can encode a variety of stimuli or other activity. The  
263 sensory signal utilized in this study may arrive in M1 directly, or from a separate source via  
264 propagating activity<sup>19</sup>. Furthermore, evidence is accumulating that M1, and other cortical modules,  
265 encode a multiplicity of features related to experience beyond their primary processing  
266 designation<sup>20-25</sup>. For future BCI applications, an array of powerful control signals can potentially  
267 be demultiplexed from a single recording site, or multiple distributed interfaces. Advanced  
268 decoding strategies<sup>6</sup> may be needed to decipher the multitude of representations encoded in neural  
269 activity and further enable demultiplexing BCIs. Regardless, the results we present here are a step  
270 towards the design of next-generation neural interfaces capable of demultiplexing multimodal  
271 neural information for distributed device control and functional improvement.

272

273

274

275

276

277

278

279

280

281

282

283

284 **Main Figures & Figure Legends:**

285 **Figure 1**

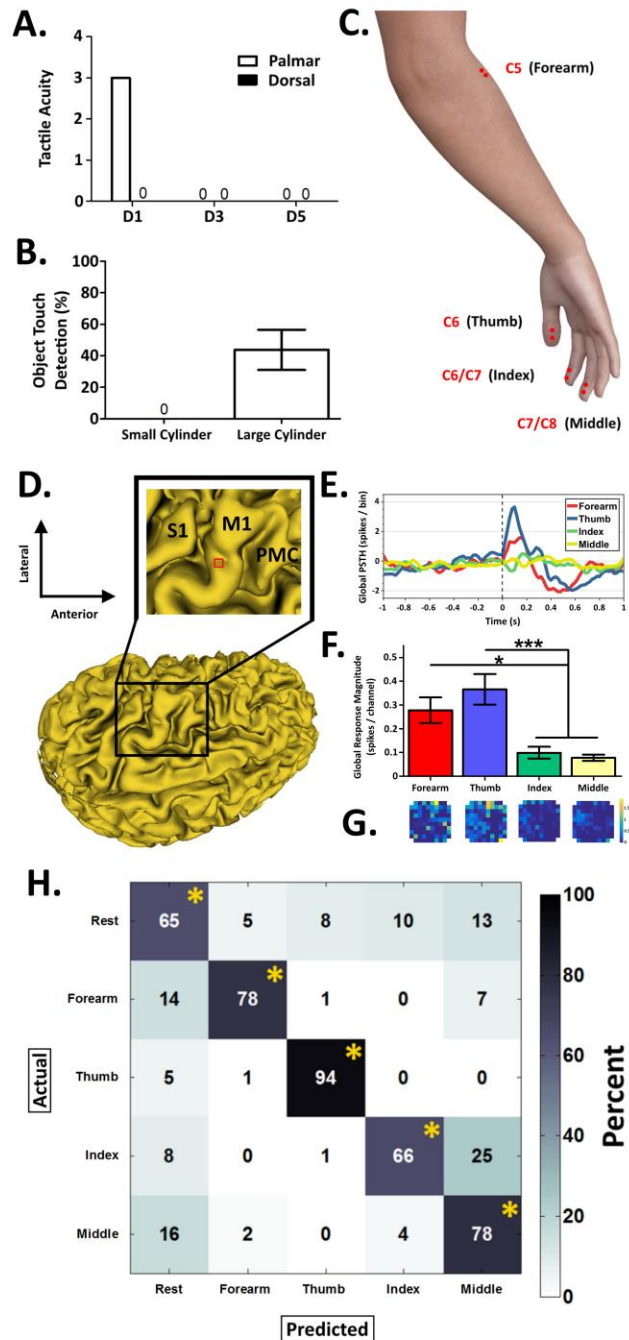

286

287 **Figure 1. Skin Stimulation on the Arm and Insensate Hand Evokes Robust & Decodable Neural Responses in**  
 288 **Contralateral Primary Motor Cortex (M1) Following Cervical Spinal Cord Injury (SCI).** A. The participant's  
 289 hand sensory function was significantly impaired following injury (using standard monofilament testing<sup>32</sup>). B. During  
 290 FES mediated grip, the participant was largely unable to discriminate object touch events in the absence of visual  
 291 feedback, operating below chance for both standardized objects. These results demonstrate that hand sensory function  
 292 is dramatically impaired following SCI. C. Electrotactile stimulation was performed at 4 different skin locations on  
 293 the right arm across a period of ~5 months to assess sensory evoked responses in M1. D. Pseudocolored 3D

294 reconstruction of the participant's cerebrum using T1 magnetic resonance imaging. Red box depicts the  
295 microelectrode recording array implanted in left M1 (S1 = primary somatosensory cortex; PMC = premotor cortex).  
296 **E.** A peri-stimulus time histogram (PSTH) was used to quantify neural modulation in M1 (skin stimulation occurs at  
297 time 0, vertical dashed line). Stimulation of the forearm or thumb evoked time locked multiunit activation, with smaller  
298 neural responses from index or middle. **F.** Stimulation of the forearm and thumb evoked significantly larger global  
299 response magnitudes compared to index or middle (\* =  $p < 0.05$ ; \*\*\* =  $p < 0.001$ ). **G.** Color coded representations of  
300 multiunit response magnitudes across the microelectrode recording array are shown below the labels in panel **C** for  
301 each stimulation location (color scaling: blues = no or small neural responses, yellow = large neural responses; units:  
302 average spikes / stimulus). **H.** Support vector machine (SVM) decoders were built using neural activity recorded  
303 during stimulation at a given skin location or for a rest period (see *Decoding Passive Sensory Stimulation* of the  
304 Methods). These passive sensory decoders reliably classified sensory stimulus location, demonstrating significant  
305 sensitivity above chance with low false positive rates (confusion matrices show color coded decoder response values,  
306 units = percent; \* = significantly above chance at  $p < 0.001$ ). These results support the hypothesis that somatosensory  
307 stimuli evoke decodable neural modulation in contralateral M1 following cervical SCI (data in **D - H** is for the  
308 maximum stimulation intensity; see Supplemental Fig. S2 for corresponding data at the minimum stimulation  
309 intensity). See *Peri-Stimulus Time Histograms* section of the Methods for additional data processing details. Data  
310 presented are mean  $\pm$  S.E.M.

311

312

313

314

315

316

317

318

319

320

321

322

323

324

325

326

327

328

329

330

331

332

333 **Figure 2**

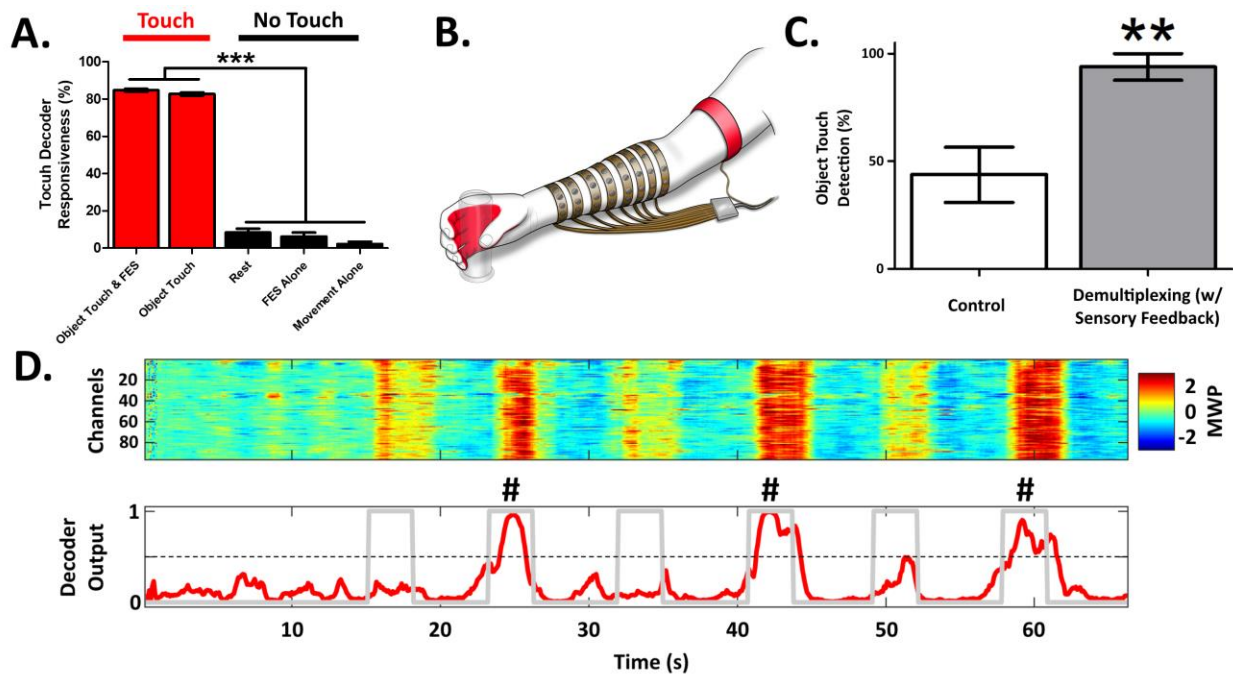

334

335 **Figure 2. Active Object Touch Can Be Decoded from M1 to Control Closed-Loop Sensory Feedback and**  
336 **Enhance Hand Sensory Function.** **A.** Touch decoders were first assessed using ‘Touch’ or ‘No Touch’ periods (see  
337 *Decoding Active Object Touch* of the Methods for more details). Touch decoders had significantly higher  
338 responsiveness during object touch events (red), compared control cues lacking object touch (black) or rest. Touch  
339 decoder false positive rates during cues (data not shown): Object Touch & FES = 12.2%; Object Touch = 13.7%; FES  
340 Alone = 3.7%; Movement Alone = 3.3%. These results support the hypothesis that machine learning algorithms can  
341 be trained to reliably demultiplex active object touch activity from M1. **B.** Touch decoders next controlled closed-  
342 loop sensory feedback via a vibrotactile array interfaced with the sensate skin over the ipsilateral bicep (red band in  
343 the cartoon schematic). Closed-loop sensory feedback triggered by residual sensory information in M1 more than  
344 doubled object touch detection during object grip (**C**, up to ~93%) (\*\* =  $p < 0.01$ ). **D.** Exemplary color-coded mean  
345 wavelet power (MWP) input (top) and touch decoder outputs (bottom) during the object touch detection assessment  
346 (object placed on cue numbers 2, 4, & 6, # symbol added; cue periods = gray lines; device activation threshold =  
347 horizontal dashed line). These results demonstrate that residual sub-perceptual sensory information can be  
348 demultiplexed from M1 to trigger closed-loop tactile feedback and significantly improve sensory function. Data  
349 presented are mean  $\pm$  S.E.M.

350

351

352

353

354

355

356

357

358

359 **Figure 3**

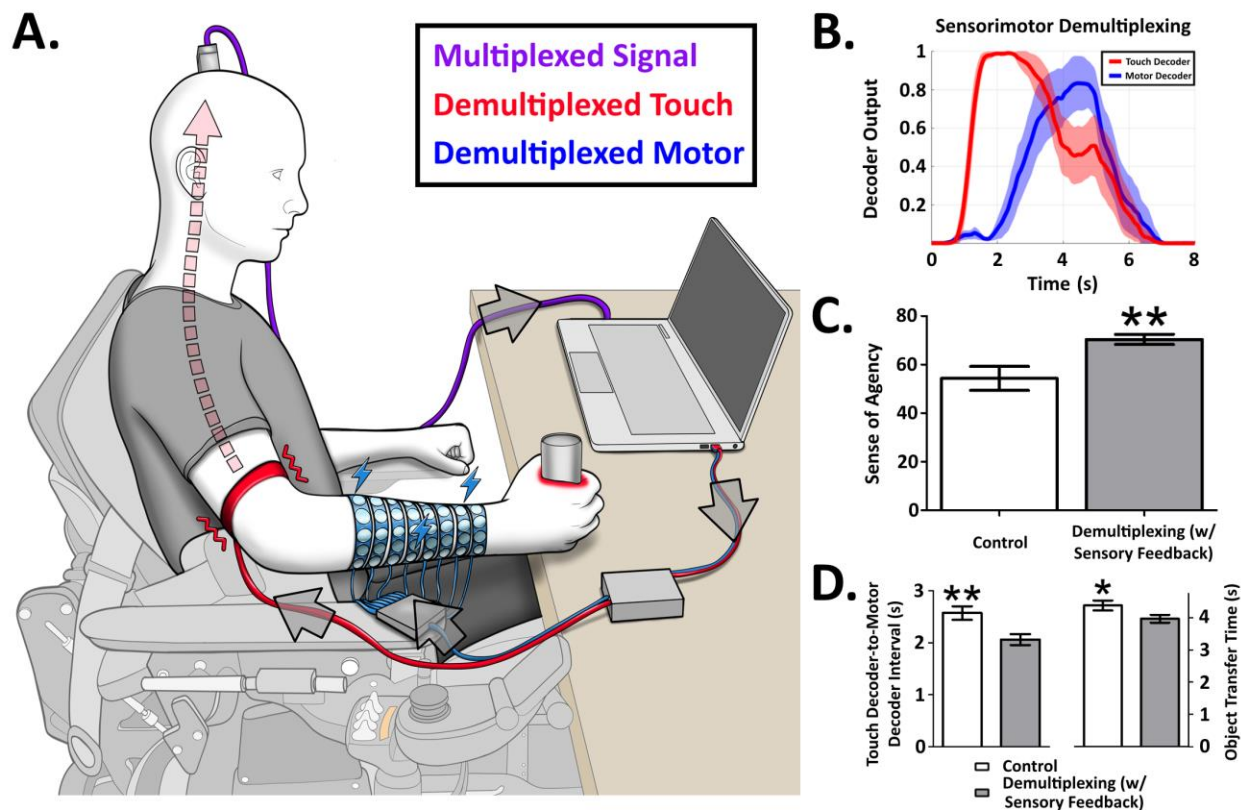

360  
 361 **Figure 3. Sensory and Motor Events in M1 Can Be Simultaneously Decoded to Enable ‘Sensorimotor**  
 362 **Demultiplexing’ BCI Control and Enhancement of Sensorimotor Function.** **A.** Schematic of the participant  
 363 performing a modified GRT<sup>13</sup> task with the ‘sensorimotor demultiplexing’ BCI. **B.** We first challenged the touch  
 364 decoder with a competing simultaneous motor decoder (during a modified GRT). As expected, touch decoders were  
 365 activated before motor decoders on all object transfers (time 0 = touch cue, followed by participant-initiated motor  
 366 intention). These results support the hypothesis that afferent touch and efferent motor intention can be simultaneously  
 367 demultiplexed from M1 during upper limb activity. Closed-loop sensory feedback triggered by demultiplexed sensory  
 368 neural activity significantly improved the participant’s sense of agency (**C**), motor decoder latency (**D**, left), and object  
 369 transfer time (**D**, right) (average number of objects transferred per GRT assessment block: control = 9, demultiplexing  
 370 with sensory feedback = 9.75). These results demonstrate the ability to simultaneously decode afferent and efferent  
 371 information from M1 and activate multiple assistive devices for augmenting sensorimotor function, constituting a  
 372 ‘sensorimotor demultiplexing’ BCI (\* =  $p < 0.05$ ; \*\* =  $p < 0.01$ ). Data presented are mean  $\pm$  S.E.M.

373

374

375

376

377

378

379

380 **References:**

- 381 1) Lebedev, MA & Nicolelis, MAL Brain-Machine Interfaces: From Basic Science to  
382 Neuroprostheses and Neurorehabilitation. *Physiol. Rev.* 97,767–837 (2017).
- 383 2) Hochberg, LR et al. Reach and grasp by people with tetraplegia using a neurally  
384 controlled robotic arm. *Nature* 485, 372–375 (2012).
- 385 3) Collinger, J. L. et al. High-performance neuroprosthetic control by an individual with  
386 tetraplegia. *The Lancet* 381, 557–564 (2013a).
- 387 4) Bouton CE, Shaikhouni A, Annetta NV, Bockbrader MA, Friedenberg DA, Nielson  
388 DM, Sharma G, Sederberg PB, Glenn BC, Mysiw WJ, Morgan AG, Deogaonkar  
389 M, Rezai AR. Restoring cortical control of functional movement in a human with  
390 quadriplegia. *Nature*. 533(7602):247-50.
- 391 5) Friedenberg DA, Schwemmer MA, Landgraf AJ, Annetta NV, Bockbrader MA, Bouton  
392 CE, Zhang M, Rezai AR, Mysiw WJ, Bresler HS, Sharma G. (2017) Neuroprosthetic  
393 enabled control of graded arm muscle contraction in a paralyzed human. *Sci Rep*.  
394 7(1):8386.
- 395 6) Schwemmer MA, Skomrock ND, Sederberg PB, Ting JE, Sharma G, Bockbrader MA,  
396 Friedenberg DA (2018) Meeting brain-computer interface user performance expectations  
397 using a deep neural network decoding framework. *Nature Medicine*. doi:  
398 10.1038/s41591-018-0171-y.
- 399 7) Colachis SC 4th, Bockbrader MA, Zhang M, Friedenberg DA, Annetta NV, Schwemmer  
400 MA, Skomrock ND, Mysiw WJ, Rezai AR, Bresler HS, Sharma G. (2018) Dexterous  
401 Control of Seven Functional Hand Movements Using Cortically-Controlled

- 402 Transcutaneous Muscle Stimulation in a Person With Tetraplegia. *Front Neurosci.*  
403 12:208. doi: 10.3389/fnins.2018.00208.
- 404 8) Ajiboye, A. B. et al. (2017) Restoration of reaching and grasping movements through  
405 brain-controlled muscle stimulation in a person with tetraplegia: a proof-of-concept  
406 demonstration. *The Lancet*. doi:10.1016/S0140-6736(17)30601-3.
- 407 9) Blabe CH, Gilja V, Chestek CA, Shenoy KV, Anderson KD, Henderson JM (2015)  
408 Assessment of brain-machine interfaces from the perspective of people with paralysis. *J*  
409 *Neural Eng*, 12:1–9.
- 410 10) Johansson RS, Flanagan JR (2009) Coding and use of tactile signals from the fingertips  
411 in object manipulation tasks. *Nat Rev Neurosci*. 10(5):345–359.
- 412 11) Wrigley PJ, Siddall PJ, Gustin SM (2018) New evidence for preserved somatosensory  
413 pathways in complete spinal cord injury: A fMRI study. *Hum Brain Mapp*. 39(1):588-  
414 598.
- 415 12) Akam T, Kullmann DM (2014) Oscillatory multiplexing of population codes for selective  
416 communication in the mammalian brain. *Nat Rev Neurosci*. 15(2):111-22.
- 417 13) Wuolle KS, Doren, CLV, Thrope, GB, Keith MW & Peckham, PH (1994) Development  
418 of a quantitative hand grasp and release test for patients with tetraplegia using a hand  
419 neuroprosthesis. *J. Hand Surg*. 19, 209–342 218.
- 420 14) Ackerley R, Kavounoudias A (2015) The role of tactile afference in shaping motor  
421 behaviour and implications for prosthetic innovation. *Neuropsychologia*. 79(Pt B):192-  
422 205. doi: 10.1016/j.neuropsychologia.2015.06.024.
- 423 15) Marasco PD, Hebert JS, Sensinger JW, Shell CE, Schofield JS, Thumser ZC, Nataraj  
424 R, Beckler DT, Dawson MR, Blustein DH, Gill S, Mensh BD, Granja-Vazquez

- 425 R, Newcomb MD, Carey JP, Orzell BM. (2018) Illusory movement perception  
426 improves motor control for prosthetic hands. *Sci Transl Med.* 10(432). pii: eaao6990. doi:  
427 10.1126/scitranslmed.aao6990.
- 428 16) Flesher SN, Collinger JL, Foldes ST, Weiss JM, Downey JE, Tyler-Kabara  
429 EC, Bensmaia SJ, Schwartz AB, Boninger ML, Gaunt RA (2016) Intracortical  
430 microstimulation of human somatosensory cortex. *Sci Transl Med.* 8(361):361ra141.
- 431 17) Godlove JM, Whaite EO, Batista AP (2014) Comparing temporal aspects of visual,  
432 tactile, and microstimulation feedback for motor control. *J Neural Eng.* 11(4):046025.
- 433 18) Synofzik M, Vosgerau G, Newen A (2008) I move, therefore I am: a new theoretical  
434 framework to investigate agency and ownership. *Conscious Cogn.* 17(2):411-24.
- 435 19) Takahashi K, Saleh M, Penn RD, Hatsopoulos NG. (2011) Propogating waves in human  
436 motor cortex. *Front Hum Neurosci.* 5:40. doi: 10.3389/fnhum.2011.00040.
- 437 20) Hatsopoulos NG, Suminski AJ. (2011) Sensing with the motor cortex. *Neuron.*  
438 72(3):477-87. doi: 10.1016/j.neuron.2011.10.020.
- 439 21) Shaikhouni A, Donoghue JP, Hochberg LR. (2013) Somatosensory responses in  
440 a human motor cortex. *J Neurophysiol.* 109(8):2192-204. doi: 10.1152/jn.00368.2012.
- 441 22) Hari R, Forss N, Avikainen S, Kirveskari E, Salenius S, Rizzolatti G. (1998) Activation  
442 of human primary motor cortex during action observation: a neuromagnetic study. *Proc*  
443 *Natl Acad Sci U S A.* 95(25):15061-5.
- 444 23) Schroeder KE, Irwin ZT, Bullard AJ, Thompson DE, Bentley JN, Stacey WC, Patil  
445 PG, Chestek CA. (2017) Robust tactile sensory responses in finger area of primate  
446 motor cortex relevant to prosthetic control. *J Neural Eng.* 14(4):046016. doi:  
447 10.1088/1741-2552/aa7329.



- 448 24) Manohar A, Foffani G, Ganzer PD, Bethea J, Moxon KA (2017) Cortex dependent  
449 recovery of unassisted hindlimb locomotion after complete spinal cord injury in the adult  
450 rat. *eLife*. 6. pii: e23532.
- 451 25) Ganzer PD, Moxon KA, Knudsen EB, Shumsky JS. (2013) Serotonergic pharmacotherapy  
452 promotes cortical reorganization after spinal cord injury. *Experimental Neurology*.  
453 241:84-94.
- 454 26) Kirshblum, S.C., Burns, S.P., Biering-Sorensen, F., Donovan, W., Graves, D.E., Jha, A.,  
455 Johansen, M., Jones, L., Krassioukov, A., Mulcahey, M.J., Schmidt-Read, M., and  
456 Waring, W. (2011). International standards for neurological classification of spinal cord  
457 injury (revised 2011). *J. Spinal Cord Med.* 34, 535–546.
- 458 27) Zhang M, Schwemmer MA, Ting JE, Majstorovic CE, Friedenber DA, Bockbrader MA,  
459 et al. (2018) Extracting wavelet based neural features from human intracortical recordings  
460 for neuroprosthetics applications. *Bioelectron Med.* 4(1):11.
- 461 28) Downey JE, Schwed N, Chase SM, Schwartz AB, Collinger JL (2018) Intracortical  
462 recording stability in human brain–computer interface users. *Journal of neural engineering*  
463 15:046016.

464 **Acknowledgements:** We would like to thank the study participant for his contributions and  
465 exceptional dedication to the ongoing clinical study and technology development. We would also  
466 like to thank our development and management teams at Battelle Memorial Institute, Nathan  
467 Platfoot and Nick Annetta for helping construct the sensory feedback interface electronics, Colin  
468 Dunlap for his assistance in the clinical assessments, Russ Kittel for his contributions to the  
469 manuscript graphics, and several Battelle team members who contributed to the preparation and  
470 review of the manuscript. A special thanks to Dr. Keith Tansey for his manuscript reviews, and  
471 critical insights regarding the clinical importance of these findings. Financial support for this study  
472 came from Battelle Memorial Institute and The Ohio State University Center for Neuromodulation.  
473

474 **Author Contributions:** P.D.G., S.C.C., M.A.S., M.A.B., and D.A.F. conceived and designed the  
475 experiments. P.D.G., S.C.C., C.E.S., M.A.B., and A.F.J. performed the experiments and analysis.  
476 P.D.G., D.J.W., and G.S. provided project supervision. All authors contributed to writing and  
477 editing the manuscript.

478

479 **Declaration of Interests:** The authors declare no competing interests.

480

481 **Materials & Correspondence.** Correspondence and materials requests should be addressed to  
482 PDG, [ganzer@battelle.org](mailto:ganzer@battelle.org).

483
